# Supplementary material for: The Effect of Radioiodine Therapy on the Prognosis of Differentiated Thyroid Cancer with Lung Metastases
Source: MDPI journal article supplement (doi:10.3390/biomedicines12030532), 2024-02-27
Supplement: s1 [file s1]

**Table S1.** Demographic and clinicopathologic features of thyroid cancer patients with and without lung metastases.

|                |                        | All       |       | Lung metastasis      |       |                     |       | <i>p</i> |
|----------------|------------------------|-----------|-------|----------------------|-------|---------------------|-------|----------|
|                |                        | (n=68709) |       | Absence<br>(n=68100) |       | Presence<br>(n=609) |       |          |
| Sex            |                        |           |       |                      |       |                     |       |          |
|                | Female ( <i>n</i> ,%)  | 53072     | 77.2% | 52755                | 77.5% | 317                 | 52.1% | <0.001   |
|                | Male ( <i>n</i> ,%)    | 15637     | 22.8% | 15345                | 22.5% | 292                 | 47.9% |          |
| Race           |                        |           |       |                      |       |                     |       |          |
|                | White ( <i>n</i> ,%)   | 54775     | 79.7% | 54312                | 79.8% | 463                 | 76.0% | 0.053    |
|                | Black ( <i>n</i> ,%)   | 4414      | 6.4%  | 4372                 | 6.4%  | 42                  | 6.9%  |          |
|                | Other ( <i>n</i> ,%)   | 9520      | 13.9% | 9416                 | 13.8% | 104                 | 17.1% |          |
| Marital status |                        |           |       |                      |       |                     |       |          |
|                | Single ( <i>n</i> ,%)  | 16885     | 24.6% | 16752                | 24.6% | 133                 | 21.8% | <0.001   |
|                | Married ( <i>n</i> ,%) | 44108     | 64.2% | 43765                | 64.3% | 343                 | 56.3% |          |
|                | Divorced( <i>n</i> ,%) | 4920      | 7.2%  | 4876                 | 7.2%  | 44                  | 7.2%  |          |
|                | Widowed ( <i>n</i> ,%) | 2796      | 4.1%  | 2707                 | 4.0%  | 89                  | 14.6% |          |
| Age(years)     |                        |           |       |                      |       |                     |       |          |
|                | <55 ( <i>n</i> ,%)     | 45523     | 66.3% | 45346                | 66.6% | 177                 | 29.1% | <0.001   |
|                | ≥55 ( <i>n</i> ,%)     | 23186     | 33.7% | 22754                | 33.4% | 432                 | 70.9% |          |
| Histology      |                        |           |       |                      |       |                     |       |          |
|                | PTC ( <i>n</i> ,%)     | 63946     | 93.1% | 63577                | 93.4% | 369                 | 60.6% | <0.001   |
|                | MTC ( <i>n</i> ,%)     | 1068      | 1.6%  | 1043                 | 1.5%  | 25                  | 4.1%  |          |
|                | FTC ( <i>n</i> ,%)     | 3293      | 4.8%  | 3226                 | 4.7%  | 67                  | 11.0% |          |
|                | ATC ( <i>n</i> ,%)     | 402       | 0.6%  | 254                  | 0.4%  | 148                 | 24.3% |          |
| Tumor size(mm) |                        |           |       |                      |       |                     |       |          |
|                | ≤10 ( <i>n</i> ,%)     | 25800     | 37.5% | 25771                | 37.8% | 29                  | 4.8%  | <0.001   |
|                | 11-20 ( <i>n</i> ,%)   | 19803     | 28.8% | 19734                | 29.0% | 69                  | 11.3% |          |
|                | 21-40 ( <i>n</i> ,%)   | 15718     | 22.9% | 15558                | 22.8% | 160                 | 26.3% |          |
|                | >40 ( <i>n</i> ,%)     | 7388      | 10.8% | 7037                 | 10.3% | 351                 | 57.6% |          |
| Stage          |                        |           |       |                      |       |                     |       | <0.001   |
|                | I ( <i>n</i> ,%)       | 48837     | 71.1% | 48837                | 71.7% | 0                   | 0.0%  | <0.001   |
|                | II ( <i>n</i> ,%)      | 4594      | 6.7%  | 4515                 | 6.6%  | 79                  | 13.0% |          |
|                | III ( <i>n</i> ,%)     | 8542      | 12.4% | 8542                 | 12.5% | 0                   | 0.0%  |          |
|                | IV ( <i>n</i> ,%)      | 4662      | 6.8%  | 4133                 | 6.1%  | 529                 | 86.9% |          |
|                | Unknown ( <i>n</i> ,%) | 2074      | 3.0%  | 2073                 | 3.0%  | 1                   | 0.2%  |          |
| T              |                        |           |       |                      |       |                     |       | <0.001   |
|                | T1 ( <i>n</i> ,%)      | 40106     | 58.4% | 40065                | 58.8% | 41                  | 6.7%  | <0.001   |
|                | T2 ( <i>n</i> ,%)      | 11647     | 17.0% | 11603                | 17.0% | 44                  | 7.2%  |          |
|                | T3 ( <i>n</i> ,%)      | 14228     | 20.7% | 14068                | 20.7% | 160                 | 26.3% |          |
|                | T4 ( <i>n</i> ,%)      | 2328      | 3.4%  | 1976                 | 2.9%  | 352                 | 57.8% |          |
|                | TX ( <i>n</i> ,%)      | 307       | 0.4%  | 298                  | 0.4%  | 9                   | 1.5%  |          |

|                         |                    |       |       |       |       |     |       |        |        |
|-------------------------|--------------------|-------|-------|-------|-------|-----|-------|--------|--------|
| N                       | T0 ( <i>n</i> ,%)  | 93    | 0.1%  | 90    | 0.1%  | 3   | 0.5%  | <0.001 |        |
|                         | N0 ( <i>n</i> ,%)  | 48794 | 71.0% | 48631 | 71.4% | 163 | 26.8% |        |        |
|                         | N1 ( <i>n</i> ,%)  | 17382 | 25.3% | 16966 | 24.9% | 416 | 68.3% |        |        |
|                         | NX ( <i>n</i> ,%)  | 2533  | 3.7%  | 2503  | 3.7%  | 30  | 4.9%  |        |        |
| Surgery of primary site |                    |       |       |       |       |     |       |        |        |
| RAI                     | No ( <i>n</i> ,%)  | 1158  | 1.7%  | 983   | 1.4%  | 175 | 28.7% | <0.001 |        |
|                         | Yes ( <i>n</i> ,%) | 67551 | 98.3% | 67117 | 98.6% | 434 | 71.3% |        |        |
|                         | No ( <i>n</i> ,%)  | 39594 | 57.6% | 39208 | 57.6% | 386 | 63.4% |        | 0.004  |
|                         | Yes ( <i>n</i> ,%) | 29115 | 42.4% | 28892 | 42.4% | 223 | 36.6% |        |        |
| EBRT                    |                    |       |       |       |       |     |       |        |        |
| Chemotherapy            | No ( <i>n</i> ,%)  | 67692 | 98.5% | 67282 | 98.8% | 410 | 67.3% | <0.001 |        |
|                         | Yes ( <i>n</i> ,%) | 1017  | 1.5%  | 818   | 1.2%  | 199 | 32.7% |        |        |
|                         | No ( <i>n</i> ,%)  | 68246 | 99.3% | 67782 | 99.5% | 464 | 76.2% |        | <0.001 |
|                         | Yes ( <i>n</i> ,%) | 463   | 0.7%  | 318   | 0.5%  | 145 | 23.8% |        |        |

RAI: radioiodine therapy; EBRT: External beam radiotherapy; TNM categories, stage groups, and definitions used by SEER are based on the AJCC 7th Edition.

**Table S2.** Surgical types of primary site in TCLM patients.

| Surgical types of primary site                           | Radioiodine therapy |              | ALL          |
|----------------------------------------------------------|---------------------|--------------|--------------|
|                                                          | Absence             | Presence     |              |
| Total thyroidectomy/Subtotal or near total thyroidectomy | 169<br>79.7%        | 211<br>95.0% | 380<br>87.6% |
| Local surgical excision                                  | 38<br>17.9%         | 10<br>4.5%   | 48<br>11.1%  |
| Unknown                                                  | 5<br>2.4%           | 1<br>0.5%    | 6<br>1.4%    |
