# Supplementary material for: The Effect of Radioiodine Therapy on the Prognosis of Differentiated Thyroid Cancer with Lung Metastases
Source: MDPI journal article supplement (doi:10.3390/biomedicines12030532), 2024-02-27
Supplement: s1 [file s1]

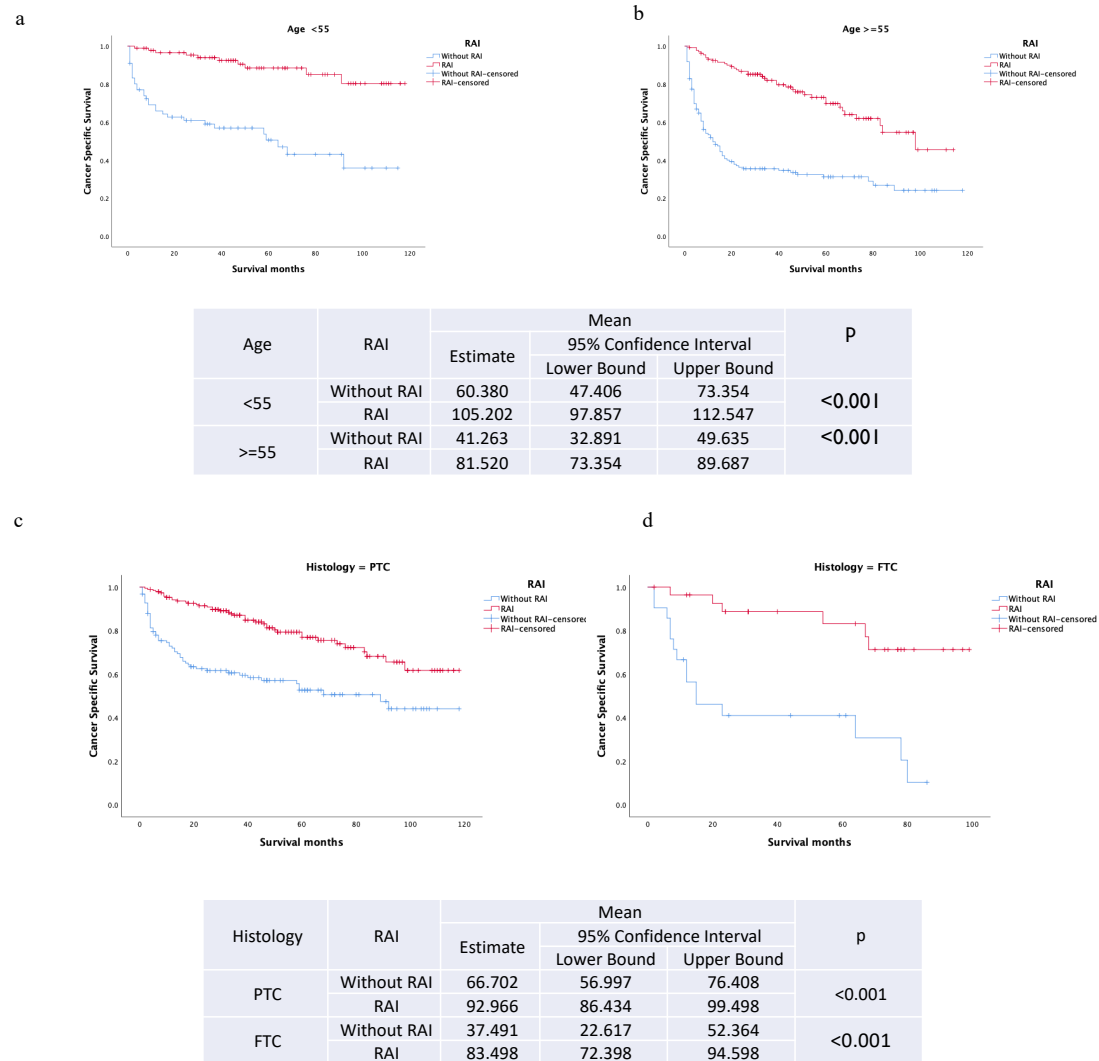

**Figure S1. Stratified Kaplan-Meier survival curves of TCSS based on subgroup of age and histology**
